# Supplementary material for: Fluorooxoborate layers: second harmonic generation and Raman spectra anisotropy
Source: Royal Society of Chemistry journal article supplement (doi:10.1039/d0nj02799e), 2020-01-01
Supplement: d0nj02799e1.pdf [file d0nj02799e1.pdf]

**Fluorooxoborate Layers: Second Harmonic Generation and Raman  
Spectra Anisotropy**

Abudukadi Tudi <sup>a,b†</sup>, Shujuan Han <sup>a†</sup>, Zhihua Yang <sup>\* a</sup>, Shilie Pan <sup>\* a</sup>

<sup>a</sup>CAS Key Laboratory of Functional Materials and Devices for Special Environments, Xinjiang Technical Institute of Physics & Chemistry, CAS; Xinjiang Key Laboratory of Electronic Information Materials and Devices, 40-1 South Beijing Road, Urumqi 830011, China.

<sup>b</sup>Center of Materials Science and Optoelectronics Engineering, University of Chinese Academy of Sciences, Beijing 100049, China.

To whom correspondence should be addressed :

E-mail: [span@ms.xjb.ac.cn](mailto:span@ms.xjb.ac.cn) (Shilie Pan).

E-mail: [zhyang@ms.xjb.ac.cn](mailto:zhyang@ms.xjb.ac.cn) (Zhihua Yang)

## Contents

|                                                                                                                                                                                                                                                                                                                                                                                                                                                                                                                                                                                                |   |
|------------------------------------------------------------------------------------------------------------------------------------------------------------------------------------------------------------------------------------------------------------------------------------------------------------------------------------------------------------------------------------------------------------------------------------------------------------------------------------------------------------------------------------------------------------------------------------------------|---|
| <b>Calculations details and methods</b> .....                                                                                                                                                                                                                                                                                                                                                                                                                                                                                                                                                  | 3 |
| <b>Fig. S1.</b> (a) The $\text{NaB}_4\text{O}_6\text{F}$ layer, (b) the electronic density of $\text{NaB}_4\text{O}_6\text{F}$ layer. The SHG densities of the $\text{NaB}_4\text{O}_6\text{F}$ layer, (c) virtual-electron (VE) occupied states and (d) VE unoccupied states.....                                                                                                                                                                                                                                                                                                             | 5 |
| <b>Fig. S2.</b> (a) The $[\text{B}_4\text{O}_6\text{F}]_\infty$ functional layer, (b) the unit cell of $\text{NH}_4\text{B}_4\text{O}_6\text{F}$ , (c) the $[\text{NH}_4\text{B}_4\text{O}_6\text{F}]_\infty$ layer, (d) the $[\text{B}_4\text{O}_6\text{F}]_\infty$ functional layer, (e) the unit cell of $\text{RbB}_4\text{O}_6\text{F}$ , (f) the $[\text{RbB}_4\text{O}_6\text{F}]_\infty$ layer, (g) $[\text{B}_5\text{O}_7\text{F}_3]_\infty$ functional layer, (h) the unit cell of $\text{CaB}_5\text{O}_7\text{F}$ , (i) the $[\text{CaB}_5\text{O}_7\text{F}_3]_\infty$ layer..... | 6 |
| <b>Fig. S3.</b> The angle dependence of the Raman intensities under parallel polarization configurations of the KBBF functional layer ( $A_g$ modes).....                                                                                                                                                                                                                                                                                                                                                                                                                                      | 7 |
| <b>References</b> .....                                                                                                                                                                                                                                                                                                                                                                                                                                                                                                                                                                        | 8 |

## Calculations details and methods

Properties of fluorooxoborate and KBBF functional layers were obtained on the basis of *ab initio* calculations implemented in the CASTEP package through density functional theory (DFT).<sup>1</sup> The generalized gradient approximation (GGA)<sup>2</sup> was adopted, and Perdew-Burke-Ernzerhof (PBE)<sup>3</sup> functional was chosen to calculate the exchange-correlation potential, with an energy cutoff of 780 eV under the Norm conserving pseudopotentials. The numerical integration of the Brillouin zone was performed using a  $3 \times 3 \times 1$  Monkhorst-Pack k-point sampling. We set the layer in the *xy* plane, and adopted a 20 Å supercell length in the *z* direction to avoid the interaction between the layers.

The SHG anisotropy of functional layers in  $C_1$ ,  $C_{2v}$  and  $C_3$  point groups can be calculated by the following equations:

$$I_{C_1}^{\parallel} = |d_{11}\cos^3\theta + (d_{12} + 2d_{26})\cos\theta\sin^2\theta + (2d_{16} + d_{21})\cos^2\theta\sin\theta + d_{22}\sin^3\theta|^2 \quad (1)$$

$$I_{C_3}^{\perp} = |d_{12}\sin^3\theta + (d_{22} - 2d_{16})\cos\theta\sin^2\theta + (2d_{26} - d_{11})\cos^2\theta\sin\theta - d_{21}\sin\cos^3\theta|^2 \quad (2)$$

$$I_{C_{2v}}^{\parallel} = |d_{22}\sin^3\theta + (d_{16} + 2d_{21})\sin\theta\cos^2\theta|^2 \quad (3)$$

$$I_{C_{2v}}^{\perp} = |d_{21}\cos^3\theta + (d_{22} - 2d_{16})\cos\theta\sin^2\theta|^2 \quad (4)$$

$$I_{C_3}^{\parallel} = |d_{22}\sin^3\theta - 2d_{22}\sin\theta\cos^2\theta|^2 \quad (5)$$

$$I_{C_3}^{\perp} = |2d_{22}\cos\theta\sin^2\theta - d_{22}\cos^3\theta|^2 \quad (6)$$

Raman scattering intensities of  $C_1$ ,  $C_{2v}$  and  $C_3$  point groups can be calculated as following equations:

$$C_1: S_{A_g}^{\parallel} = |a\cos^2\theta + b\sin^2\theta + 2d\sin\theta\cos\theta|^2 \quad (7)$$

$$S_{A_g}^{\perp} = |d\cos^2\theta - d\sin^2\theta + (b - a)\sin\theta\cos\theta|^2 \quad (8)$$

$C_{2v}$ :

$$S_{A_{1g}}^{\parallel} = |a\cos^2\theta + b\sin^2\theta|^2 \quad (9)$$

$$S_{A_{1g}}^{\perp} = |b\sin\theta\cos\theta - a\sin\theta\cos\theta|^2 \quad (10)$$

$$S_{A_{2g}}^{\parallel} = |2d\sin\theta\cos\theta|^2 \quad (11)$$

$$S_{A_{2g}}^{\perp} = |d\cos^2\theta - d\sin^2\theta|^2 \quad (12)$$

$C_3$  :

$$S_{A_g}^{\parallel} = |a\cos^2\theta + a\sin^2\theta|^2 \quad (13)$$

$$S_{A_g}^{\perp} = 0 \quad (14)$$

$$S_{E_g}^{\parallel} = |c\cos^2\theta - c\sin^2\theta + 2d\sin\theta\cos\theta|^2 \quad (15)$$

$$S_{E_g}^{\perp} = |d\cos^2\theta - d\sin^2\theta - 2c\sin\theta\cos\theta|^2 \quad (16)$$

$$S_{E_g}^{\parallel} = |d\cos^2\theta - d\sin^2\theta - 2c\sin\theta\cos\theta|^2 \quad (17)$$

$$S_{E_g}^{\perp} = |c\sin^2\theta - c\cos^2\theta - 2d\sin\theta\cos\theta|^2 \quad (18)$$

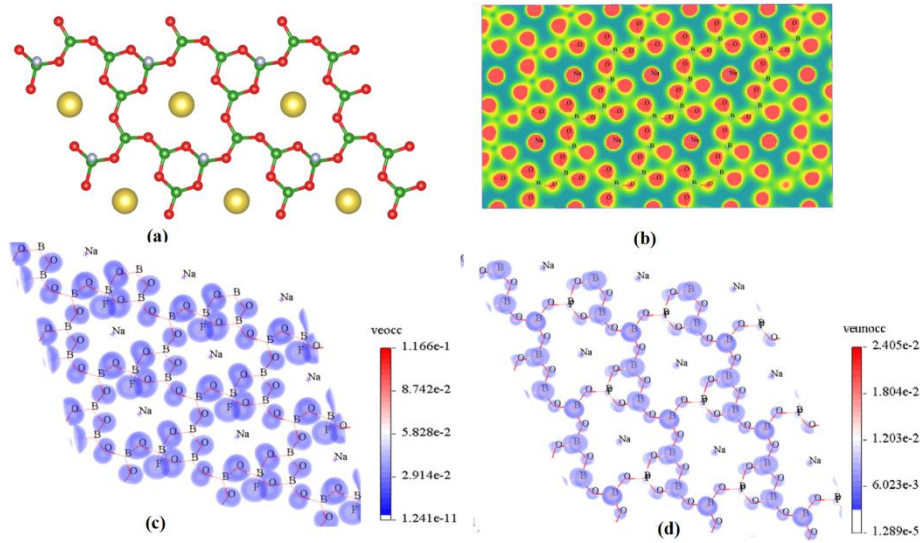

**Fig. S1** (a) The  $\text{NaB}_4\text{O}_6\text{F}$  layer, (b) the electronic density of  $\text{NaB}_4\text{O}_6\text{F}$  layer. The SHG densities of the  $\text{NaB}_4\text{O}_6\text{F}$  layer, (c) virtual-electron (VE) occupied states and (d) VE unoccupied states.

The highlighted electronic density of the  $\text{NaB}_4\text{O}_6\text{F}$  layer shows the anisotropy of bonding electron distributions of the B-O-F layer, which indicates its significant role in the birefringence (Fig. S1b). The SHG-density of virtual-electron(VE) occupied (veocc) and unoccupied (veunocc) states are shown in Fig. 1c, 1d. For the occupied states, O-2*p* and F-2*p* orbitals make significant contribution to the SHG effects. In unoccupied states, the B-2*p*, O-2*p* and F-2*p* orbitals contribute to the SHG response. Therefore, the  $\text{NaB}_4\text{O}_6\text{F}$  layer plays a key role both in SHG response and birefringence, which exhibits the characteristic of functional layers for the nonlinear optical performances.

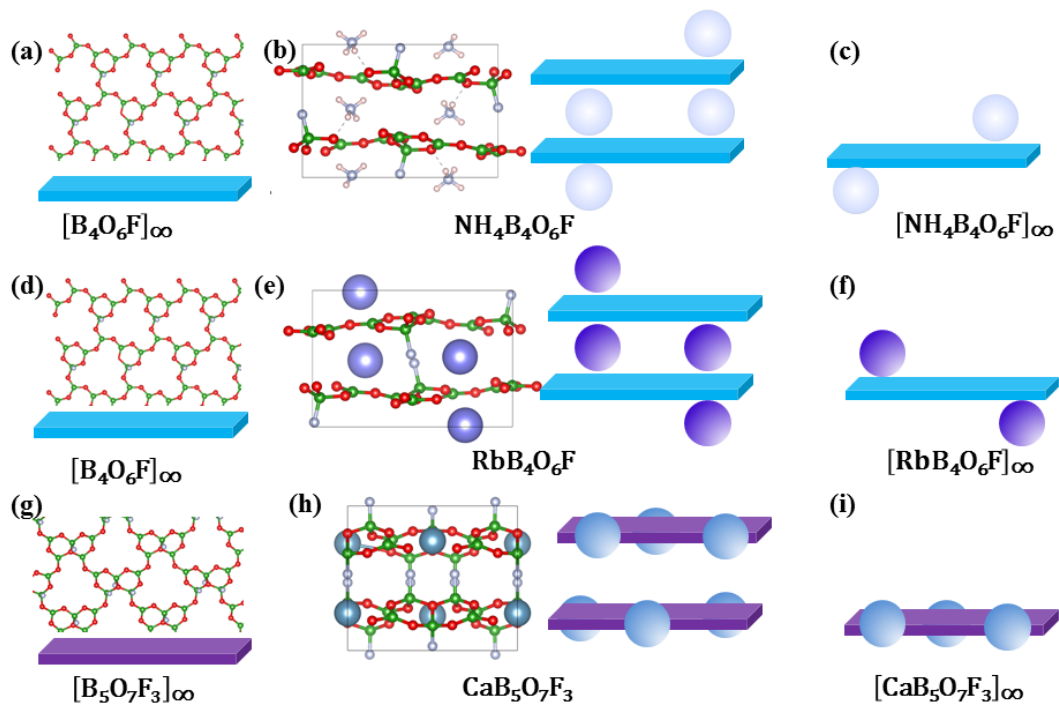

**Fig. S2** (a) The  $[B_4O_6F]_\infty$  functional layer, (b) the unit cell of  $NH_4B_4O_6F$ , (c) the  $[NH_4B_4O_6F]_\infty$  layer, (d) the  $[B_4O_6F]_\infty$  functional layer, (e) the unit cell of  $RbB_4O_6F$ , (f) the  $[RbB_4O_6F]_\infty$  layer, (g)  $[B_5O_7F_3]_\infty$  functional layer, (h) the unit cell of  $CaB_5O_7F_3$ , (i) the  $[CaB_5O_7F_3]_\infty$  layer.

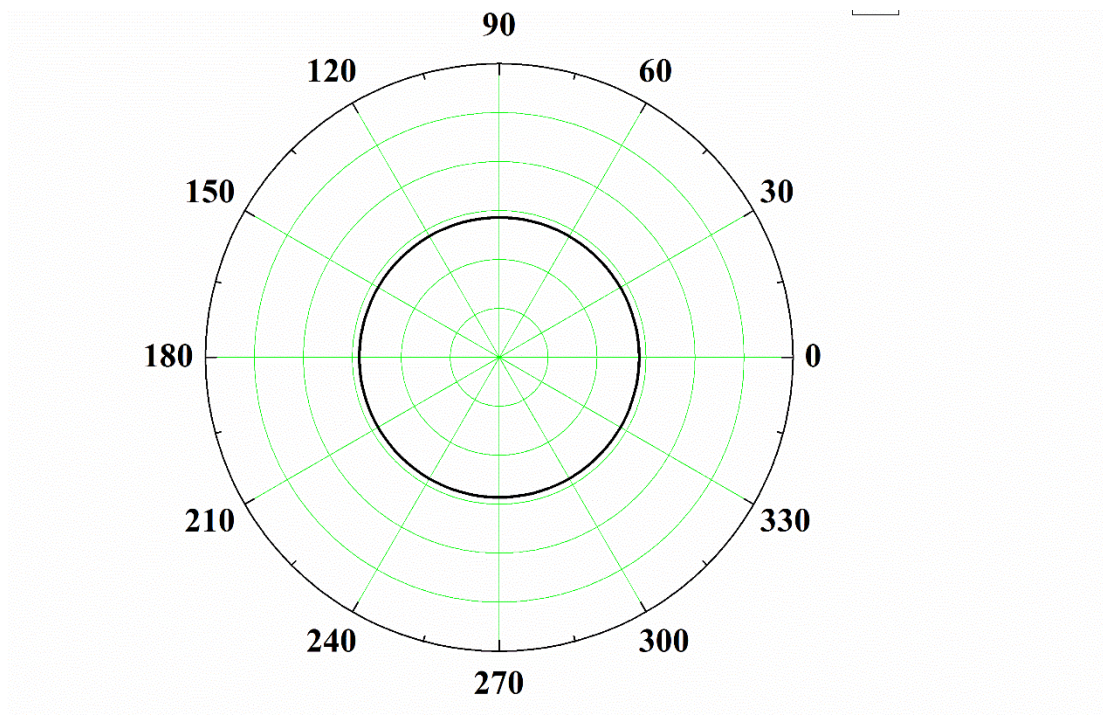

**Fig. S3.** The angle dependence of the Raman intensities under parallel polarization configurations of the KBBF functional layer ( $A_g$  modes).

## References

- 1 S. J. Clark, M. D. Segall, C. J. Pickard, P. J. Hasnip, M. J. Probert, K. Refson and M. C. Payne, *Z. Kristallogr.*, 2005, **220**, 567.
- 2 J. P. Perdew, K. Burke and M. Ernzerhof, *Phys. Rev. Lett.*, 1996, *77*, 3865.
- 3 A. M. Rappe, K. M. Rabe, E. Kaxiras and J. D. Joannopoulos, *Phys. Rev. B*, 1990, **41**, 1227.
